# Supplementary material
Source: PubMed Central journal article supplement (PMC3912957)
Supplement: supp_2013.090217_2013.090217.West_suppl.pdf [file supp_2013.090217_2013.090217.West_suppl.pdf]

## Acquired *ASXL1* mutations are common in patients with inherited *GATA2* mutations and correlate with myeloid transformation

Robert R. West,<sup>1</sup> Amy P. Hsu,<sup>2</sup> Steven M. Holland,<sup>2</sup> Jennifer Cuellar-Rodriguez,<sup>2</sup> and Dennis D. Hickstein<sup>1</sup>

<sup>1</sup>Experimental Transplantation and Immunology Branch, Center for Cancer Research, National Cancer Institute, National Institutes of Health, Bethesda, MD, USA; and <sup>2</sup>Laboratory of Clinical Infectious Diseases, National Institute of Allergy and Infectious Diseases, National Institutes of Health, Bethesda, MD, USA

---

©2013 Ferrata Storti Foundation. This is an open-access paper. doi:10.3324/haematol.2013.090217

Manuscript received on April 24, 2013. Manuscript accepted on September 27, 2013.

Correspondence: westrob@mail.nih.gov

**Supplemental Table 1. PCR primers used for *ASXL1* genotyping**

| <b>Primer</b> | <b>Orientation</b> | <b>Sequence</b>                 |
|---------------|--------------------|---------------------------------|
| 1             | 5' - fwd           | GTTTTGCTTTACAGTCCCTAGGTCAG      |
| 2             | 5' - fwd           | GGTCAGATCACCCAGTCAGTTAAAAC      |
| 3             | 3' - rev           | GTCCTCCCAAACCTCAGTAGC           |
| 4             | 3' - rev           | GGGCTAGGAGATGCCTCCC             |
| 5             | 5' - fwd           | GCATACCCAGGCCGGAAC              |
| 6             | 3' - rev           | CCTATGAGGGAAAGTGATACTAGACAAG    |
| 7             | 5' - fwd           | CAGTTCCACACCTGAATCCTCACC        |
| 8             | 3' - rev           | CCAAGGTGAATGGTGACATGC           |
| 9             | 5' - fwd           | GCAGTGACAAAGGGATCTTCG           |
| 10            | 3' - rev           | GCAGTTCTCTTCCTTTAGTTGTGA        |
| 11            | 5' - fwd           | CAGTGGCATGGTTGATGGAAG           |
| 15            | 3' - rev           | CATTGATATAATACTCTTTAGGCAGGAGCAC |
| 12A           | 5' - fwd           | GTGCACCACACAGATTTATTTGTTT       |
| 12B           | 3' - rev           | GATTATAGAGCCCTTAACTCTGGGGC      |

Primers used for PCR amplification and DNA sequencing are based on the *ASXL1* sequence given for NCBI Reference Sequence: NG\_027868.1

**Supplemental Table 2. Chronological patient number, DNA sample sources, and previously published pedigree designation.**

| #               | DNA source                                                           | Pedigree | Reference  |
|-----------------|----------------------------------------------------------------------|----------|------------|
| 1               | PB granulocyte/mononuclear cells<br>BM granulocyte/mononuclear cells | 35.III.3 | 2          |
| 2               | BM granulocyte/mononuclear cells                                     | 25.II.1  | 40         |
| 3 <sup>A</sup>  | peripheral blood leukocytes                                          | 1.II.5   | 3,5,40     |
| 4 <sup>A</sup>  | peripheral blood leukocytes                                          | 1.II.1   | 2,3,5      |
| 5 <sup>B</sup>  | peripheral blood leukocytes                                          | 4.II.1   | 5,40,41    |
| 6 <sup>B</sup>  | peripheral blood leukocytes                                          | 4.I.1    | 3,5,40     |
| 7               | peripheral blood leukocytes                                          | 8.I.1    | 3,5,40,42  |
| 8               | peripheral blood leukocytes                                          | 3.I.1    | 2,5        |
| 9               | peripheral blood leukocytes<br>PB granulocyte/mononuclear cells      | 5.II.1   | 2,5        |
| 10              | peripheral blood leukocytes                                          | 12.I.1   | 3,5,41     |
| 11 <sup>C</sup> | peripheral blood leukocytes                                          | 13.II.1  | 3,5,40,43  |
| 12 <sup>C</sup> | peripheral blood leukocytes                                          | 13.I.1   | 3,5,40,43  |
| 13              | peripheral blood leukocytes                                          | 11.II.1  | 5,40       |
| 14              | blood smear<br>BM granulocyte/mononuclear cells                      | 10.I.1   | 3,5        |
| 15              | blood smear                                                          | 20.I.3   | 3,42       |
| 16              | blood smear                                                          | 18.I.2   | 3          |
| 17              | blood smear                                                          | 17.I.1   | 5,41       |
| 18              | blood smear,<br>BM granulocyte/mononuclear cells                     | 24.I.1   | 3          |
| 19              | peripheral blood leukocytes                                          | 26.I.1   | 40,41      |
| 20 <sup>C</sup> | peripheral blood leukocytes                                          | 34.II.2  | not pub.   |
| 21 <sup>C</sup> | peripheral blood leukocytes                                          | 34.I.1   | not pub.   |
| 22              | BM granulocyte/mononuclear cells                                     | 40.I.1   | 40         |
| 23 <sup>A</sup> | peripheral blood leukocytes                                          | 33.III.1 | 40         |
| 24 <sup>A</sup> | peripheral blood leukocytes                                          | 33.III.3 | 40         |
| 25              | peripheral blood leukocytes                                          | 6.II.1   | 5,40,41,44 |
| 26 <sup>D</sup> | peripheral blood leukocytes<br>BM granulocyte/mononuclear cells      | 31.II.1  | not pub.   |
| 27 <sup>D</sup> | BM granulocyte/mononuclear cells                                     | 31.II.2  | not pub.   |
| 28              | peripheral blood leukocytes                                          | 27.I.1   | 40         |
| 29              | peripheral blood leukocytes                                          | 29.I.1   | 40         |
| 30 <sup>E</sup> | PB granulocyte/mononuclear cells                                     | 39.I.1   | not pub.   |
| 31 <sup>E</sup> | PB granulocyte/mononuclear cells                                     | 39.I.2   | not pub.   |
| 32              | BM granulocyte/mononuclear cells                                     | 15.I.1   | 3,5,40,41  |
| 33              | peripheral blood leukocytes<br>PB granulocyte/mononuclear cells      | 38.I.1   | 41         |
| 34              | peripheral blood leukocytes                                          | 43.I.1   | not pub.   |
| 35              | BM granulocyte/mononuclear cells                                     | 9.III.1  | 3,5        |
| 36              | peripheral blood leukocytes                                          | 28.I.1   | not pub.   |
| 37              | peripheral blood leukocytes                                          | 37.I.1   | 40         |
| 38              | peripheral blood leukocytes                                          | 44.I.1   | not pub.   |
| 39              | peripheral blood leukocytes                                          | 22.I.1   | 5,40       |
| 40 <sup>B</sup> | peripheral blood leukocytes                                          | 30.II.1  | 40         |
| 41 <sup>B</sup> | peripheral blood leukocytes                                          | 30.I.1   | 40         |
| 42              | PB granulocyte/mononuclear cells                                     | 41.I.1   | 40         |
| 43              | blood smear<br>BM granulocyte/mononuclear cells                      | 42.I.1   | not pub.   |

|    |                             |          |          |
|----|-----------------------------|----------|----------|
| 44 | peripheral blood leukocytes | 46.I.1   | not pub. |
| 45 | peripheral blood leukocytes | 7.I.1    | 5,40     |
| 46 | peripheral blood leukocytes | 14.I.1   | 5        |
| 47 | peripheral blood leukocytes | 21.II.1  | 3,42     |
| 48 | peripheral blood leukocytes | 48.III.1 | not pub. |

A, sisters; B, daughter/father; C, son/mother; D, brothers; E, monozygotic twins. PB, peripheral blood; BM, bone marrow.

**Supplemental Table 3. Single nucleotide polymorphisms observed in the *ASXL1* gene, exons 12 and 13, among GATA2 deficiency patients**

| dbSNP number | alleles | residue change          |
|--------------|---------|-------------------------|
| rs79865730   | C/T     | Thr <sup>655</sup> Thr  |
| rs6058693    | G/A     | Val <sup>751</sup> Ile  |
| novel*       | A/G     | Leu <sup>764</sup> Leu  |
| rs6058694    | C/T     | Pro <sup>815</sup> Leu  |
| rs62206933   | C/T     | His <sup>995</sup> His  |
| rs75887545   | C/G     | Ser <sup>1166</sup> Arg |
| rs117901891  | G/A     | Leu <sup>1173</sup> Leu |
| rs74638057   | C/T     | Ser <sup>1231</sup> Phe |
| rs4911231    | T/C     | Ser <sup>1253</sup> Ser |
| rs6057581    | C/T     | Leu <sup>1325</sup> Phe |
| rs2295764    | A/G     | 3'UTR                   |

Ten single nucleotide polymorphisms (SNPs) found in the dbSNP database were identified among the GATA2 deficiency patients, and one novel SNP. dbSNP number is from the Database of Single Nucleotide Polymorphisms (dbSNP), Bethesda (MD): National Center for Biotechnology Information, National Library of Medicine. (dbSNP Build ID: {138, phase 1}). \* This SNP is not in dbSNP, but it is the third position of the codon, giving a synonymous coding sequence change. It is also not at a splice acceptor/donor site. Therefore, it was not considered to be a pathological *ASXL1* mutation.

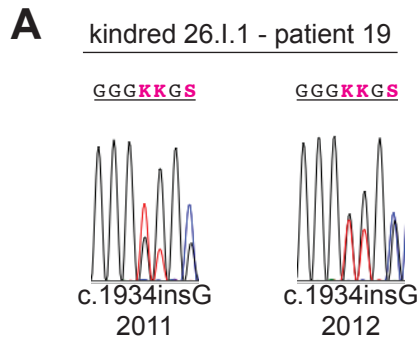

**Supplemental Figure 1. DNA sequence trace for *ASXL1* mutation c.1934insG in patient 19.** Patient 19 had an increase in the signal for the c.1934insG mutation over time, which correlated with an increasing blast count and the development of proliferative CMML.
